# Supplementary material for: Bridging the gap between reference and real transcriptomes
Source: Genome Biol. 2019 Jun 3;20:112. doi: 10.1186/s13059-019-1710-7 (PMC6545731; doi:10.1186/s13059-019-1710-7)
Supplement: Supplementary file 1 — Table S1. Overview of major eukaryotic transcriptome databases. Table S2. Large-scale RNA-seq projects (human). Table S3. Sequencing methods providing insight on specific events shown in Fig 2. Table S4. Transcript variations related to cancer and other diseases; and software for retrieving these variations from RNA-seq data. (XLSX 18 kb) [file 13059_2019_1710_MOESM1_ESM.xlsx]

## Sheet: S1
Table S1. Overview of major eukaryotic transcriptome databases
Species	Database	Type	Transcript generation method	Count source*	URL
Human+Mouse	FANTOM5	Data	RNA-seq + CAGE-seq, assembled using Riken pipeline	-	http://fantom.gsc.riken.jp
Human	Encode	Data	polyA+ and total RNA-seq + RNA-PET	-	https://www.encodeproject.org
Fly, worm	modEncode	Data	polyA+ and total RNA-seq + RACE + ESTs (fly) + tiling array (worm)	-	https://www.encodeproject.org
Yeast	Ito	Data	Full-length cDNA (Sanger)	-	http://itolab.med.kyushu-u.ac.jp//GCap/download.html
	Steinmetz	Data	TIF-seq (cohesive ends RNA-seq)	-	In suppl. material of publication
All species	Ensembl	Integ	Human: Selected Gencode transcripts. Other species: Ensembl annotation process based on public cDNA/EST/RNA-seq data.	gtf files	http://www.ensembl.org/
	RefSeq	Integ	Combination of summitter annotation, organism-specific curation and RefSeq eukaryotic gene annotation pipeline.	gff files	https://www.ncbi.nlm.nih.gov/refseq/
Human+Mouse	Gencode	Integ	Curation + Ensembl annotation process	web site	https://www.gencodegenes.org
Fly	Flybase	Integ	Manually curated transcript models, mainly from modENCODE RNA-seq data	gtf file	http://flybase.org/
Worm	Wormbase	Integ	cDNAs, ESTs, assembled RNA-seq reads from modEncode	gff3 and fasta file	https://wormbase.org
Arabidopsis	Araport	Integ	RNA-seq, EST, full-length cDNAs	web site	www.araport.org
Yeast	SGD	Integ	Only ORFs and non-coding RNAs	gff file	http://www.yeastgenome.org
Human	miTranscriptome	RNAseq	RNA-seq data mining (Encode, TCGA)	publication	http://mitranscriptome.org
	BIGtranscriptome	RNAseq	RNA-seq data mining (Encode, TCGA, GTEX, Bodymap)	publication	http://bhyou.dothome.co.kr
	CHESS	RNAseq	RNA-seq data mining (GTEX)	publication	http://ccb.jhu.edu/chess/
		Integ	Integrative database
		RNAseq	Direct computational RNA-seq assembly
		Data	Orginal data production
		*	source used for gene/transcript counts in Figure 1

## Sheet: S2
	Table S2. Large-scale RNA-seq projects (human)
	Collection	# libraries	Reference
	TCGA	12000	Cancer Genome Atlas Research Network. 2013. PMID: 24071849
	Gtex	11000	Carither et al. 2015. PMID: 26484571
	Protein Atlas	8000	Uhlen et al. 2015. PMID: 25613900
	Encode	2300	David et al. 2018. PMID: 29126249
	Geuvadis	1100	Lappalainen et al. 2013. PMID: 24037378
	CCLE	650	Barretina et al. 2012. PMID: 22460905
	Leucegene	550	Lavalée et al. 2018. PMID: 29550835
	Total	35600

## Sheet: S3
Table S3. Sequencing methods providing insight on specific events shown in Fig 2.
Event type	Method
single nucleotide variation or short indel	standard RNA-seq
microsatellite variation	standard RNA-seq
transposition	standard RNA-seq
gene fusion	standard RNA-seq
bidirectional transcription start sites	CAGE-seq, TSS-seq, strand-specific total RNA-seq, NET-seq
antisense transcript	ribodepleted, stranded RNA-seq
enhancer RNA	Ribodepleted total RNA-seq, NET-seq
alternative TSS	CAGE-seq, TIF-seq, RNA-PET
alternative 5’ splice site	standard RNA-seq
alternative 3’ SS	standard RNA-seq
alternative 3’ SS	standard RNA-seq
skipped exon	standard RNA-seq
alternative polyA site	3'-seq, polyA-seq
editing and modification	M6A-seq, RiboMethSeq, AlkAniline-Seq, Pseudo-seq
processed pre-mi/snoRNA, siRNA, piRNA	small RNA-seq
circular RNA	Exome capture RNA-seq, total RNA-seq, Total 5'OH RNA processing RNA-seq
full isoforms	TIF-seq or combination of TSS and 3'-sequencing, RACE-seq, long read RNA-seq
Method	PubMed ID
3'-seq	28602807
AlkAniline-Seq	30370969
CAGE-seq	24676093
Exome capture RNA-seq	30735636
M6A-seq	22575960
NET-seq	22470065
polyA-seq	22454233
Pseudo-seq	25192136
RACE-seq	19317658
RiboMethSeq	27302133
RNA-PET	22113299
TIF-seq	23615609
Total 5'OH RNA processing RNA-seq	26805575, 28798046

## Sheet: S4
Table S4. Transcript variations related to cancer and other diseases; and software for retrieving these variations fom RNA-seq data
		Cancer	Other Disease	Biomarkers	Regulatory	Software
1	Fusion transcripts	C	D		R	EricScript (see benchmark)
2	Transcripts from rearranged Ig genes	C	D			MiXCR
3	RNA editing and modification	C				MES, RDDpred
4	Alternative splice sites	C	D		R	Leafcutter, MISO, MAJIQ
5	Trans-spliced products	C				Leafcutter, MISO, MAJIQ
6	Alternative polyadenylation sites	C	D		R	DaPars (from standard RNA-seq)
7	Microsatellite expansion	C	D			No specific tool for RNA-seq
8	Retrotransposed mRNAs	C	D			No specific tool for RNA-seq
9	Reactivated retrotransposons	C				SalmonTE
10	Endogenous viral transcripts	C			R	Salmon/Kallisto with dedicated RefT
11	Exogenous pathogen RNA	C	D			Salmon/Kallisto with dedicated RefT
12	Novel lncRNAs	C	D	B	R	DERfinder, RNAprof, Dekupl
13	Circular RNAs	C	D	B	R	circRNA_finder (RefT-free)(see benchmark)
14	Antisense RNAs	C		B	R	StringTie, DERfinder, RNAprof, Dekupl
15	SNVs in transcripts	C	D	B	R	GATK (HaplotypeCaller option)
	circRNA_finder	Westholm et al. 2014. PMID: 25544350
	circular RNA software benchmark	Hansen et al. 2016. PMID: 26657634
	DaPars	Xia et al. 2014. PMID: 25409906
	DERfinder	Collado-Torres et al. 2017. PMID: 27694310
	EricScript	Benelli. et al. 2012. PMID: 23093608
	Fusion software benchmark	Kumar et al. 2016. PMID: 26862001
	GATK	Van der Auwera et al. 2013. PMID: 25431634
	Kallisto	Bray et al., 2016. PMID: 27043002
	Leafcutter	Li al., 2018. PMID: 29229983
	MAJIQ	Vaquero-Garcia et al. 2016. PMID: 26829591
	MES	PengPeng et al., 2012. PMID: 22327324
	MISO	Katz et al. 2010. PMID: 21057496
	MiXCR	Bolotin et al., 2015. PMID: 25924071
	RDDpred	Kim et al., 2016. PMID: 26817607
	Salmon	Patro et al. 2017. PMID: 28263959
	SalmonTE	Jeong et al., 2018. PMID: 29218879
	StringTie	Pertea et al., 2015. PMID: 25690850
